# Supplementary material for: Oxygen self-doped g-C3N4with tunable electronic band structure for unprecedentedly enhanced photocatalytic performance
Source: Royal Society of Chemistry journal article supplement (doi:10.1039/c7nr09660g), 2018-01-01
Supplement: c7nr09660g1.pdf [file c7nr09660g1.pdf]

## Supporting Information

### Oxygen Self-doped g-C<sub>3</sub>N<sub>4</sub> with Tunable Electronic Band Structure for Unprecedentedly Enhanced Photocatalytic Performance

Fangyan Wei,<sup>a</sup> Yang Liu,<sup>a</sup> Heng Zhao,<sup>a</sup> Xiaoning Ren,<sup>a</sup> Jing Liu,<sup>a</sup> Tawfique Hasan,<sup>b</sup> Lihua  
Chen,<sup>a</sup> Yu Li\*<sup>a</sup> and Bao-Lian Su<sup>a,c,d</sup>

<sup>a</sup> *State Key Laboratory of Advanced Technology for Materials Synthesis and Processing, Wuhan University of Technology, 122 Luoshi Road, 430070, Wuhan, Hubei, China; Fax: +86 27 87879468; Tel: +86 27 87855322*

*Email: [yu.li@whut.edu.cn](mailto:yu.li@whut.edu.cn)*

<sup>b</sup> *Cambridge Graphene Centre, University of Cambridge, 9 JJ Thomson Avenue, Cambridge CB3 0FA, United Kingdom*

<sup>c</sup> *Laboratory of Inorganic Materials Chemistry, University of Namur, 61 rue de Bruxelles, B-5000 Namur, Belgium*

<sup>d</sup> *Clare Hall, University of Cambridge, Herschel Road, Cambridge CB3 9AL, United Kingdom*

**Table S1.** The molar mass of DCNA and CC.

| samples | DCNA (mmol) | CC (mmol) | CC / DCNA |
|---------|-------------|-----------|-----------|
| CNO-0.5 | 2.5         | 5         | 0.5       |
| CNO-1   | 5           | 5         | 1         |
| CNO-2   | 10          | 5         | 2         |
| CNO-4   | 20          | 5         | 4         |

**Table S2.** XPS nitride spectra; peak area and N (SP<sup>2</sup>)/N (SP<sup>3</sup>) of N<sub>1</sub> peak.

| samples | Relative peak area (%) |                    |       |     |                                           |
|---------|------------------------|--------------------|-------|-----|-------------------------------------------|
|         | C-N=C                  | N-(C) <sub>3</sub> | C-N-H | C=N | N (SP <sup>2</sup> )/N (SP <sup>3</sup> ) |
| CN-Pure | 70.0                   | 16.4               | 10.7  | 2.9 | 4.26                                      |
| CNO-1   | 59.4                   | 31.7               | 8.9   | 0.0 | 1.87                                      |
| CNO-2   | 52.9                   | 32.2               | 14.9  | 0.0 | 1.64                                      |
| CNO-4   | 59.0                   | 30.6               | 10.4  | 0.0 | 1.93                                      |

**Table S3.** The atomic rate of C, N, O and band gap for CN-Pure and CN-X samples.

| samples | Atomic (%) |      |      |      |             | Band gap (eV) |
|---------|------------|------|------|------|-------------|---------------|
|         | C          | N    | O    | C/N  | C : N : O   |               |
| CN-Pure | 40.2       | 57.9 | 1.9  | 0.69 | 0.69:1:0.03 | 2.70          |
| CNO-1   | 43.7       | 47.5 | 8.8  | 0.92 | 0.92:1:0.19 | 2.19          |
| CNO-2   | 43.3       | 46.9 | 9.8  | 0.92 | 0.92:1:0.21 | 2.11          |
| CNO-4   | 46.7       | 43.3 | 10.0 | 1.08 | 1.08:1:0.23 | 2.07          |

**Table S4.** XPS carbon spectra; peak area of C 1s peak.

| Samples | Relative peak area(%) |       |       |     |      |
|---------|-----------------------|-------|-------|-----|------|
|         | C-C                   | C-O-C | N=C-N | C=N | C-O  |
| CN-Pure | 3.6                   | 0.0   | 89.1  | 7.3 | 0.0  |
| CNO-1   | 19.1                  | 12.2  | 65.2  | 0.0 | 3.4  |
| CNO-2   | 19.8                  | 9.4   | 55.1  | 0.0 | 15.7 |
| CNO-4   | 25.1                  | 15.8  | 45.8  | 0.0 | 13.2 |

**Table S5.** XPS nitride spectra; peak area of N 1s peak.

| sample  | Relative peak area (%) |                    |       |     |
|---------|------------------------|--------------------|-------|-----|
|         | C-N=C                  | N-(C) <sub>3</sub> | C-N-H | C=N |
| CN-Pure | 70.0                   | 16.4               | 10.7  | 2.9 |
| CNO-1   | 59.4                   | 31.7               | 8.9   | 0.0 |
| CNO-2   | 52.9                   | 32.2               | 14.9  | 0.0 |
| CNO-4   | 59.0                   | 30.6               | 10.4  | 0.0 |

**Table S6.** XPS oxygen spectra; peak area of O 1s peak

| Sample  | Relative peak area (%) |                |       |       |
|---------|------------------------|----------------|-------|-------|
|         | H <sub>2</sub> O       | O <sub>2</sub> | C-O-C | N-C-O |
| CN-Pure | 100.0                  |                |       |       |
| CNO-1   |                        | 2.2            | 21.4  | 76.4  |
| CNO-2   |                        | 3.2            | 13.0  | 83.8  |
| CNO-4   |                        | 5.3            | 20.5  | 74.2  |

**Table S7.** Pt loading on CN-pure and CNO-x (wt %)

| Samples           | CN-pure | CNO-0.5 | CNO-1 | CNO-2 | CNO-4 |
|-------------------|---------|---------|-------|-------|-------|
| Pt loading (wt %) | 0.347   | 0.342   | 0.364 | 0.272 | 0.285 |

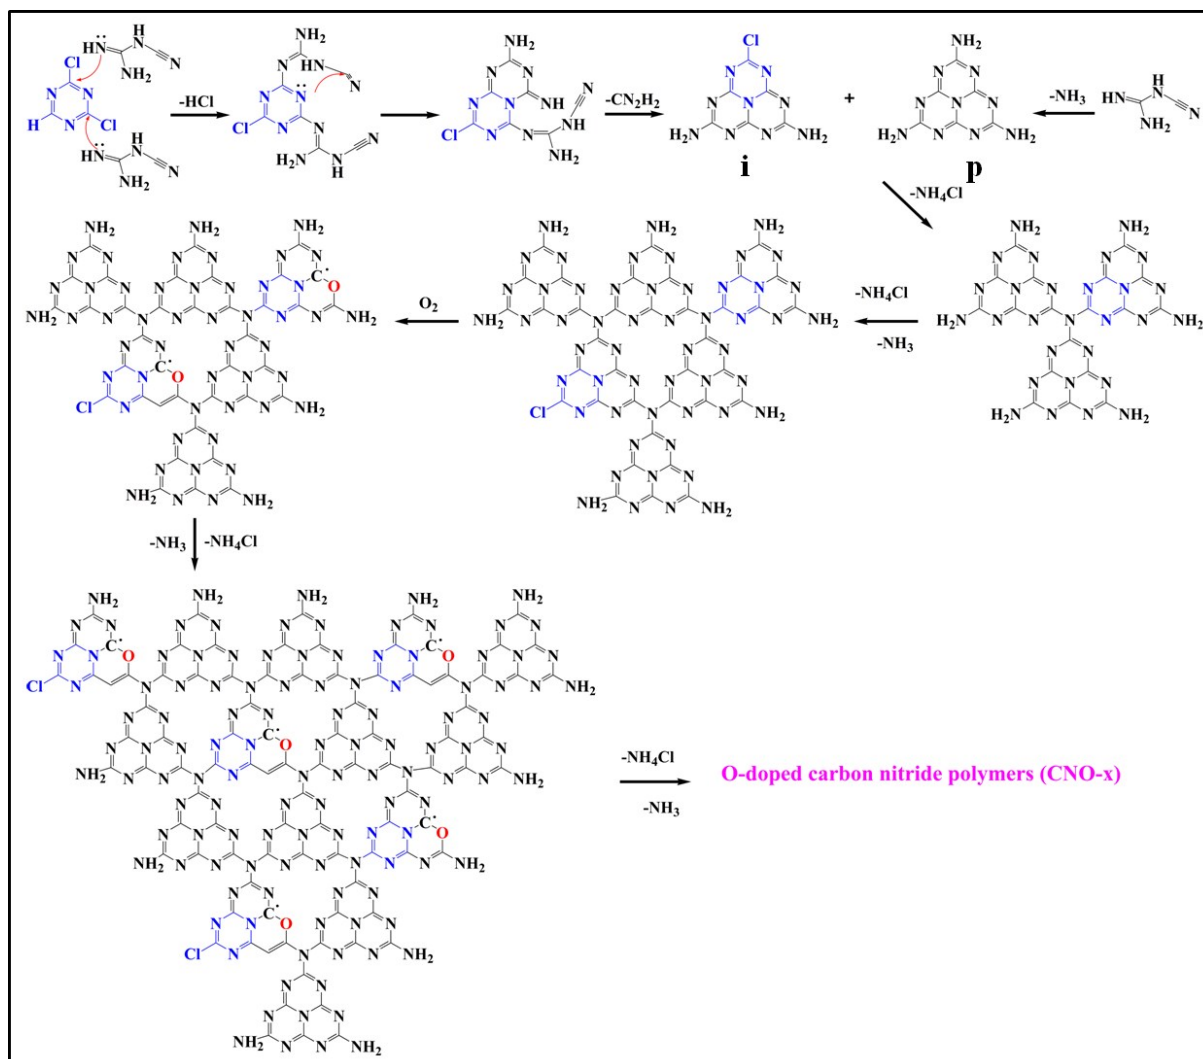

**Figure S1.** The copolymerization of dicyandiamide with 1,3,5-trichlorotriazine. The linkers can be integrated into the classic condensation process of oxygen self-doped  $\text{g-C}_3\text{N}_4$  (CNO-x).

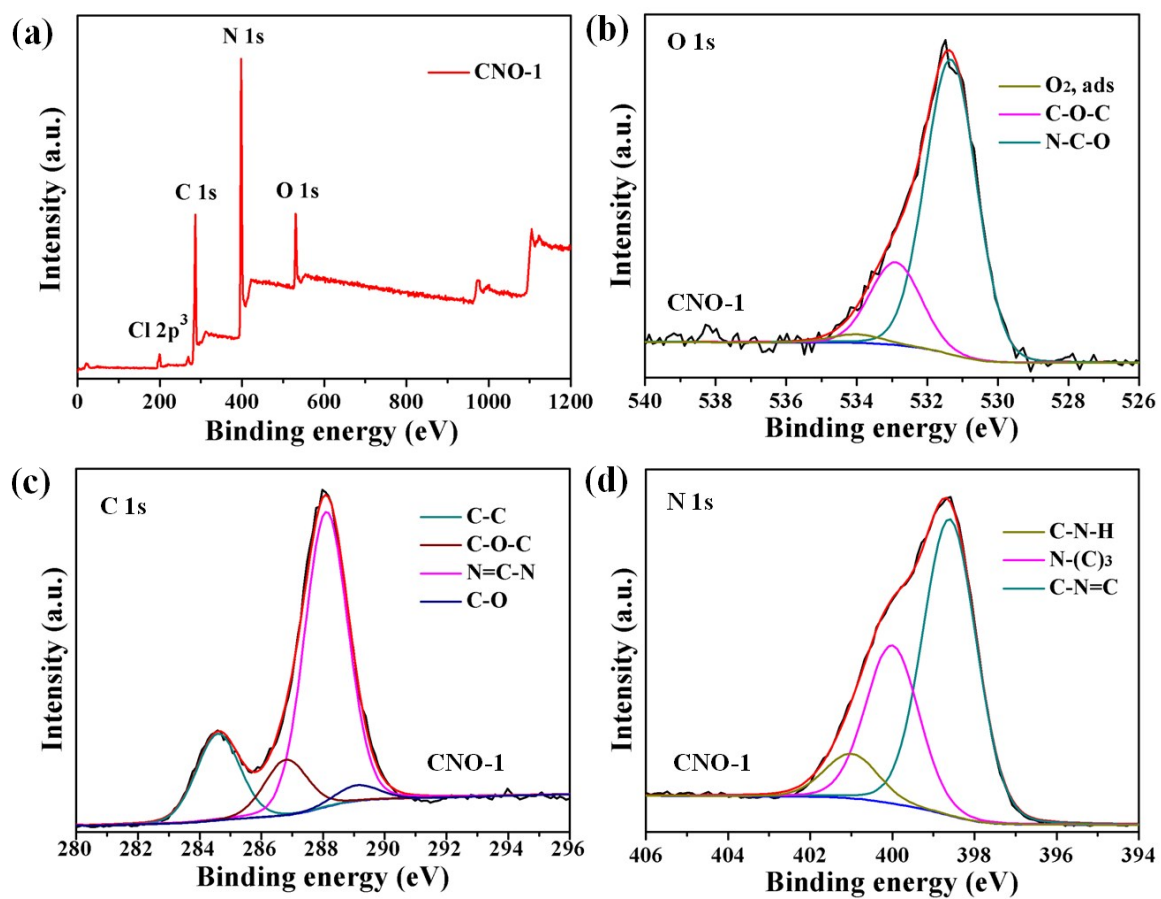

**Figure S2.** (a) XPS survey spectra and (b, c, d) High resolution O 1s, C 1s, N 1s XPS spectra of CNO-1.

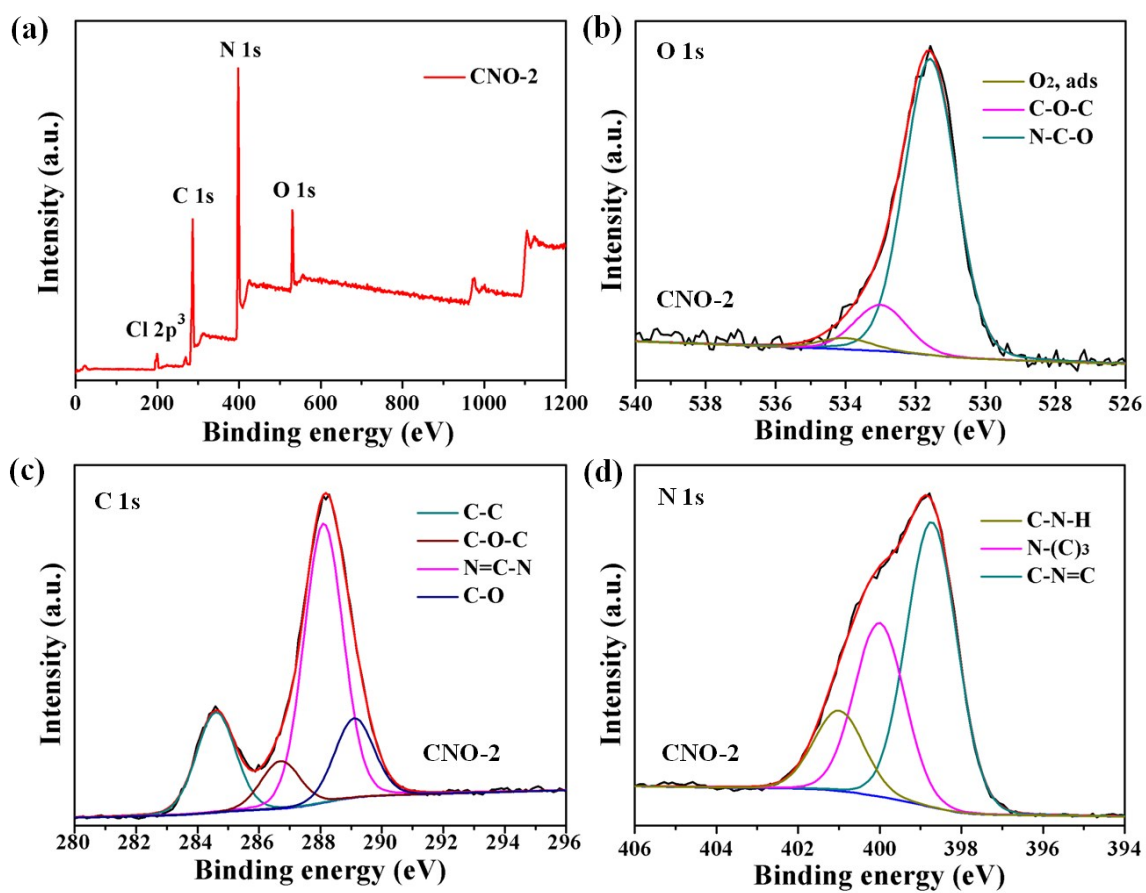

**Figure S3.** (a) XPS survey spectra and (b, c, d) High resolution O 1s, C 1s, N 1s XPS spectra of CNO-2.



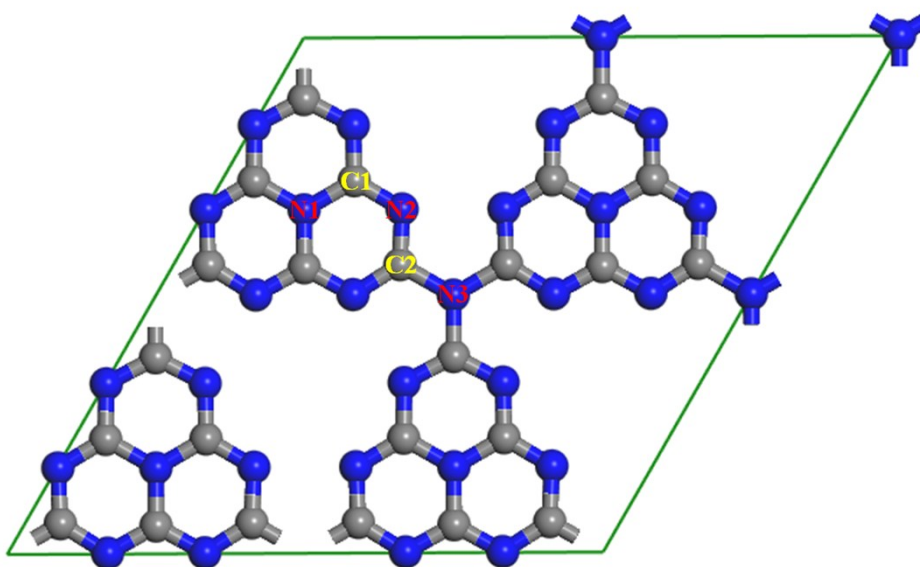

**Figure S4.** Structure of g-C<sub>3</sub>N<sub>4</sub>. The gray and blue spheres represent the carbon and nitrogen atoms, respectively, and different carbon and nitrogen atoms are labelled.

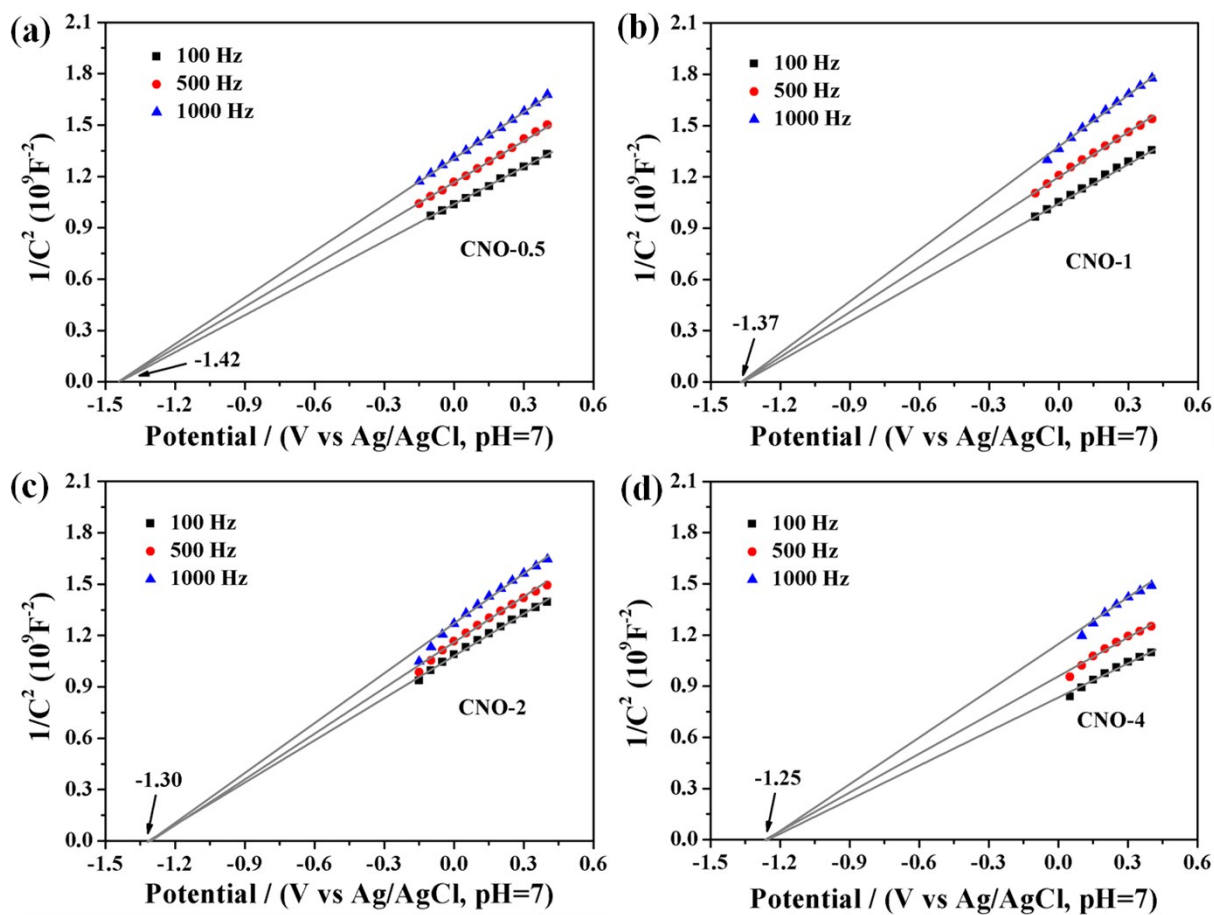

**Figure S5.** Mott-Schottky plots collected at various frequencies of (a) CNO-0.5, (b) CNO-1, (c) CNO-2 and (d) CNO-4.

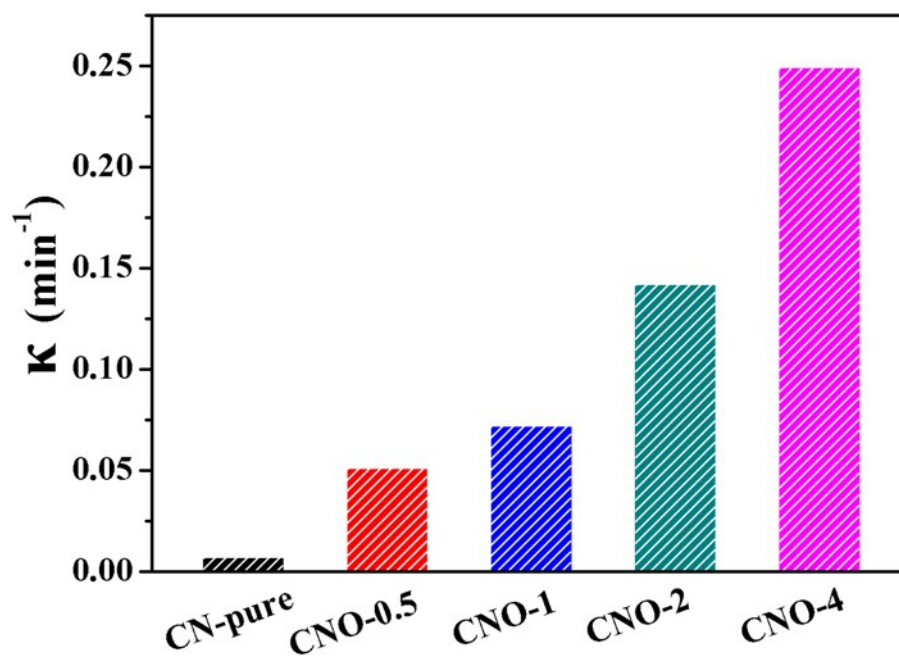

**Figure S6.** The rate constant of RhB degradation with different samples.
